# Supplementary material for: Orthologue chemical space and its influence on target prediction
Source: PubMed Central journal article supplement (PMC5870859; doi:10.1093/bioinformatics/btx525), 2017-08-26

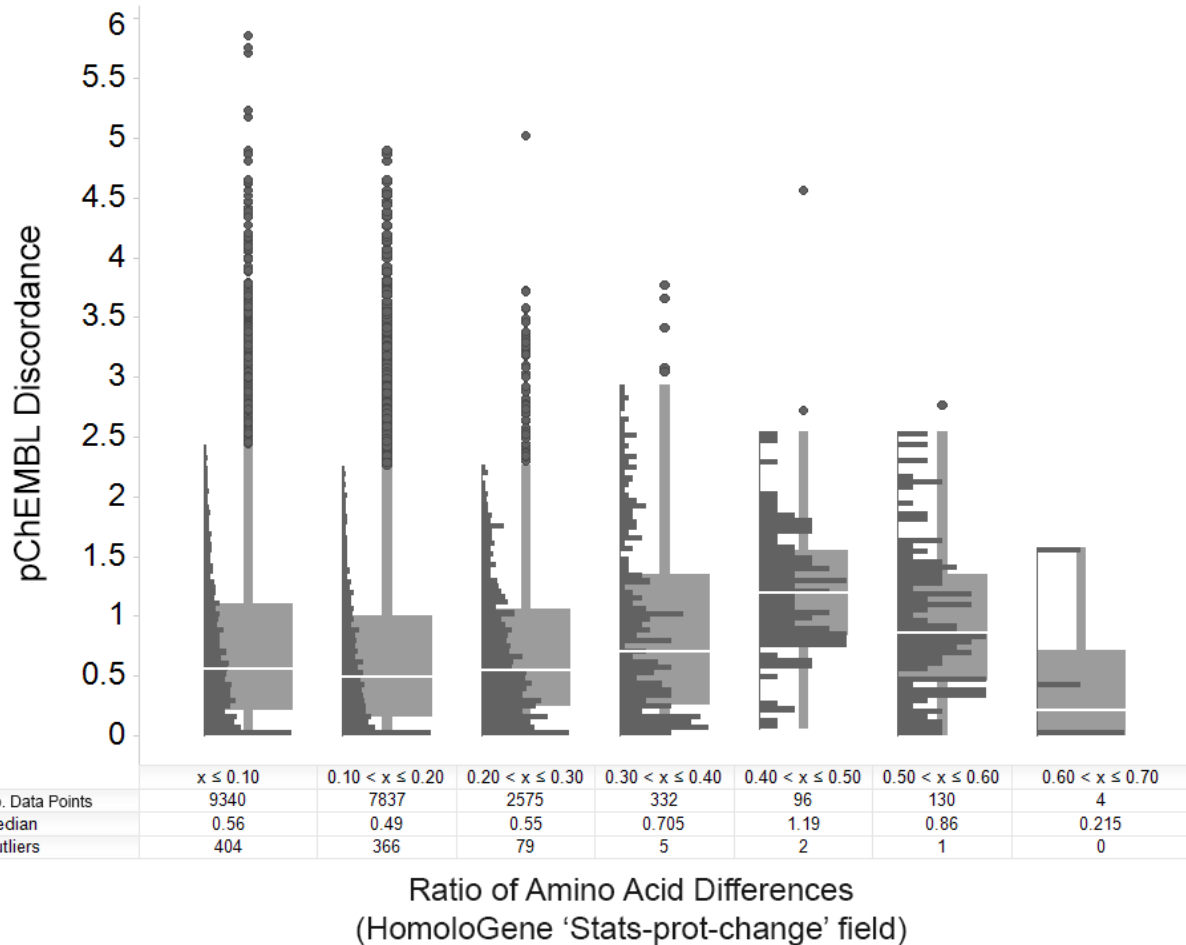

Supplement: sf5_btx525.pdf [file sf5_btx525.pdf]
